# Supplementary material
Source: PubMed Central journal article supplement (PMC5823769)
Supplement: NIHMS933727-supplement-Graphic_Abstract.pdf [file NIHMS933727-supplement-Graphic_Abstract.pdf]

### Endothelial cell-derived VWF

Increase platelet/leukocyte adhesion on activated endothelium

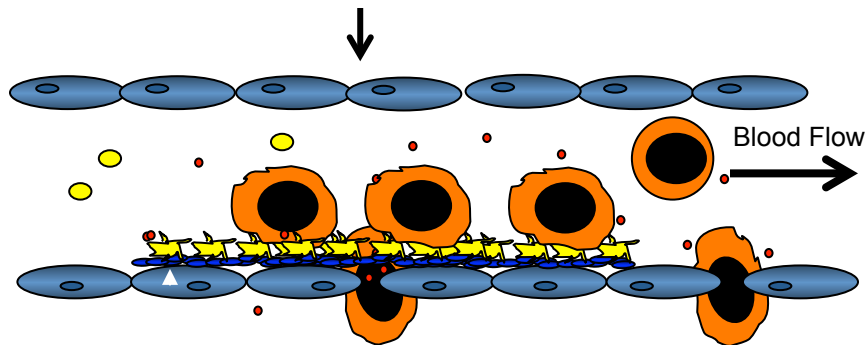

Increased vascular inflammation

Atherosclerosis exacerbation

### Platelet-derived VWF or No VWF

Decrease platelet/leukocyte adhesion on activated endothelium

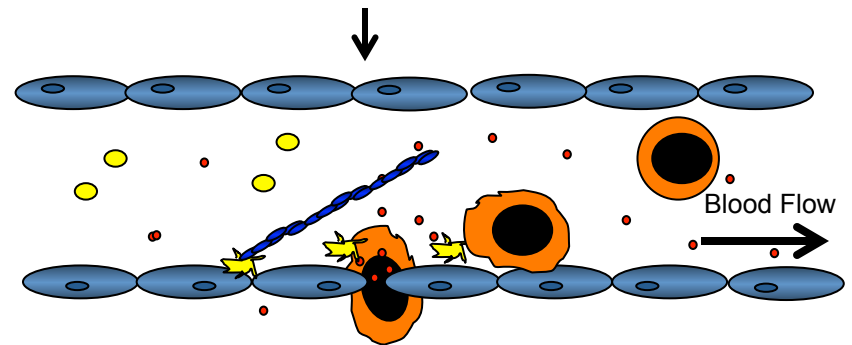

Decreased vascular inflammation

Less Atherosclerosis

Endothelial cell   Monocyte   Platelet   Activated platelet   Platelet activation product

VWF
