# Supplementary material
Source: PubMed Central journal article supplement (PMC5823769)
Supplement: NIHMS933727-supplement-online_supplements.pdf [file NIHMS933727-supplement-online_supplements.pdf]

## Online Supplement

### **Endothelial cell-derived von Willebrand factor, but not platelet-derived, promotes atherosclerosis in Apoe-deficient mice**

Prakash Doddapattar<sup>1</sup>, Nirav Dhanesha<sup>1</sup>, Mehul R. Chorawala<sup>1</sup>, Chandler Tinsman<sup>2</sup>,  
Manish Jain<sup>1</sup>, Manasa K. Nayak<sup>1</sup>, Janice M. Staber<sup>2</sup>, and Anil K. Chauhan<sup>1</sup>

<sup>1</sup>Department of Internal Medicine, University of Iowa, Iowa City, IA; <sup>2</sup>Stead Family  
Department of Pediatrics, University of Iowa, Iowa City, IA

**Table SI.** Complete blood counts were comparable among groups. Value are expressed as mean  $\pm$  SEM. N= 10-12 mice/group. Statistical analysis: Parametric one-way ANOVA followed by Sidak's multiple comparisons test. P=Non significant.

|                           | <i>Apoe</i> <sup>-/-</sup> -BM in <i>Apoe</i> <sup>-/-</sup> mice (n=11) | <i>Vwf</i> <sup>-/-</sup> <i>Apoe</i> <sup>-/-</sup> -BM in <i>Apoe</i> <sup>-/-</sup> mice (n=11) | <i>Vwf</i> <sup>-/-</sup> <i>Apoe</i> <sup>-/-</sup> -BM in <i>Vwf</i> <sup>-/-</sup> <i>Apoe</i> <sup>-/-</sup> mice (n=12) | <i>Apoe</i> <sup>-/-</sup> -BM in <i>Vwf</i> <sup>-/-</sup> <i>Apoe</i> <sup>-/-</sup> mice (n=11) | <i>Adamts13</i> <sup>-/-</sup> <i>Apoe</i> <sup>-/-</sup> -BM in <i>Adamts13</i> <sup>-/-</sup> <i>Vwf</i> <sup>-/-</sup> <i>Apoe</i> <sup>-/-</sup> mice (n=10) |
|---------------------------|--------------------------------------------------------------------------|----------------------------------------------------------------------------------------------------|------------------------------------------------------------------------------------------------------------------------------|----------------------------------------------------------------------------------------------------|------------------------------------------------------------------------------------------------------------------------------------------------------------------|
| RBC (10 <sup>6</sup> /μL) | 9.6 $\pm$ 0.5                                                            | 9.3 $\pm$ 0.2                                                                                      | 9.3 $\pm$ 0.3                                                                                                                | 9.1 $\pm$ 0.4                                                                                      | 9.3 $\pm$ 0.2                                                                                                                                                    |
| WBC (10 <sup>3</sup> /μL) | 12.0 $\pm$ 1.9                                                           | 8.2 $\pm$ 1.2                                                                                      | 11.0 $\pm$ 1.3                                                                                                               | 8.5 $\pm$ 1.1                                                                                      | 10.1 $\pm$ 0.9                                                                                                                                                   |
| HGB (g/dL)                | 13.8 $\pm$ 1.1                                                           | 13.4 $\pm$ 0.4                                                                                     | 11.6 $\pm$ 0.8                                                                                                               | 13.3 $\pm$ 0.8                                                                                     | 12.6 $\pm$ 0.7                                                                                                                                                   |
| HCT (%)                   | 42.6 $\pm$ 2.49                                                          | 44.3 $\pm$ 0.77                                                                                    | 41.6 $\pm$ 1.46                                                                                                              | 40.6 $\pm$ 1.40                                                                                    | 42.0 $\pm$ 1.18                                                                                                                                                  |
| PLT (10 <sup>3</sup> /μL) | 1021 $\pm$ 103                                                           | 1056 $\pm$ 35                                                                                      | 1077 $\pm$ 42                                                                                                                | 891 $\pm$ 41                                                                                       | 879 $\pm$ 71                                                                                                                                                     |

**A**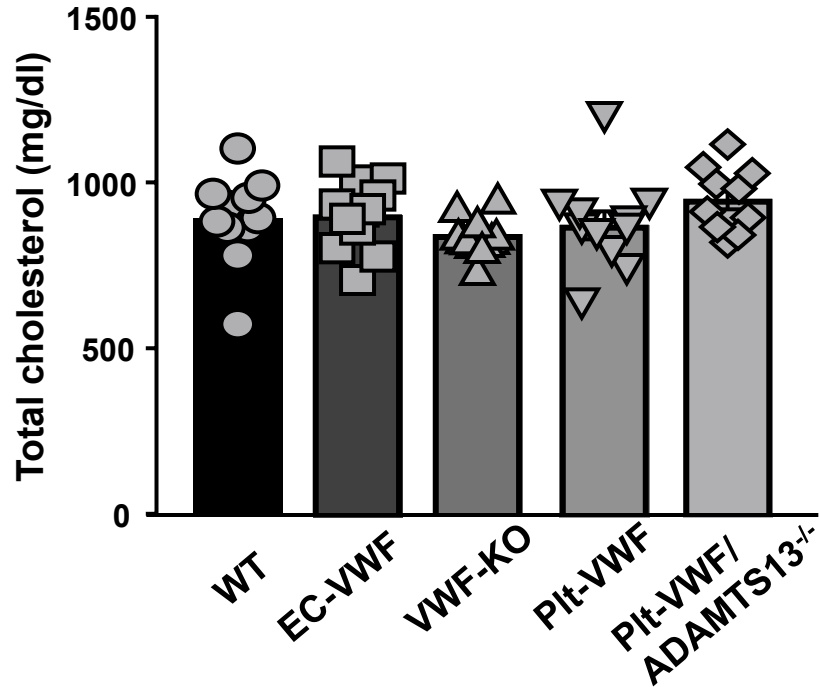**B**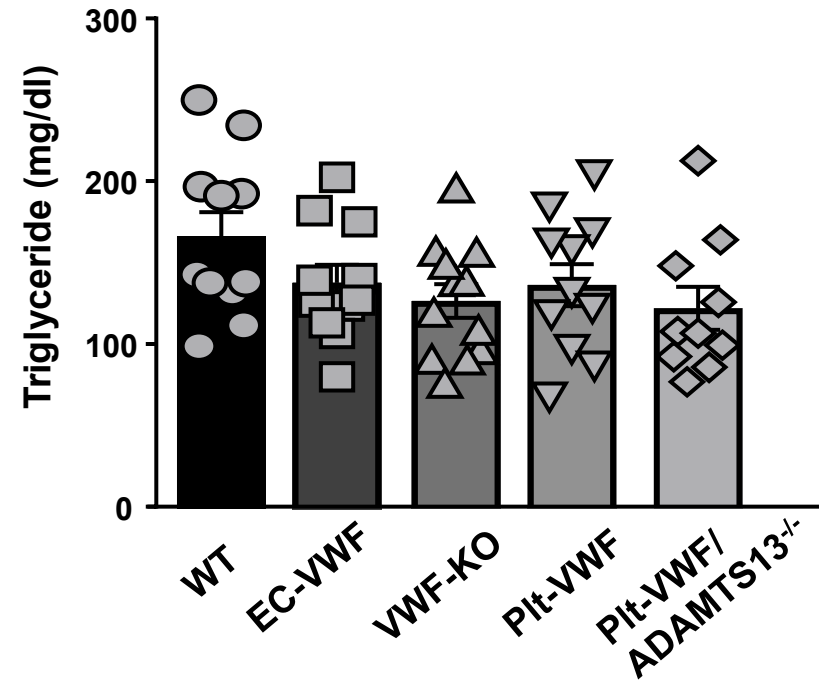

**Figure SI. Plasma total cholesterol and triglyceride levels in female mice fed a high-fat “Western” diet for 14 weeks.** Values are represented as means  $\pm$  SEM. N=10-12 mice/group. Statistical analysis: Parametric one-way ANOVA followed by Sidak's multiple comparisons test. P= Non significant.

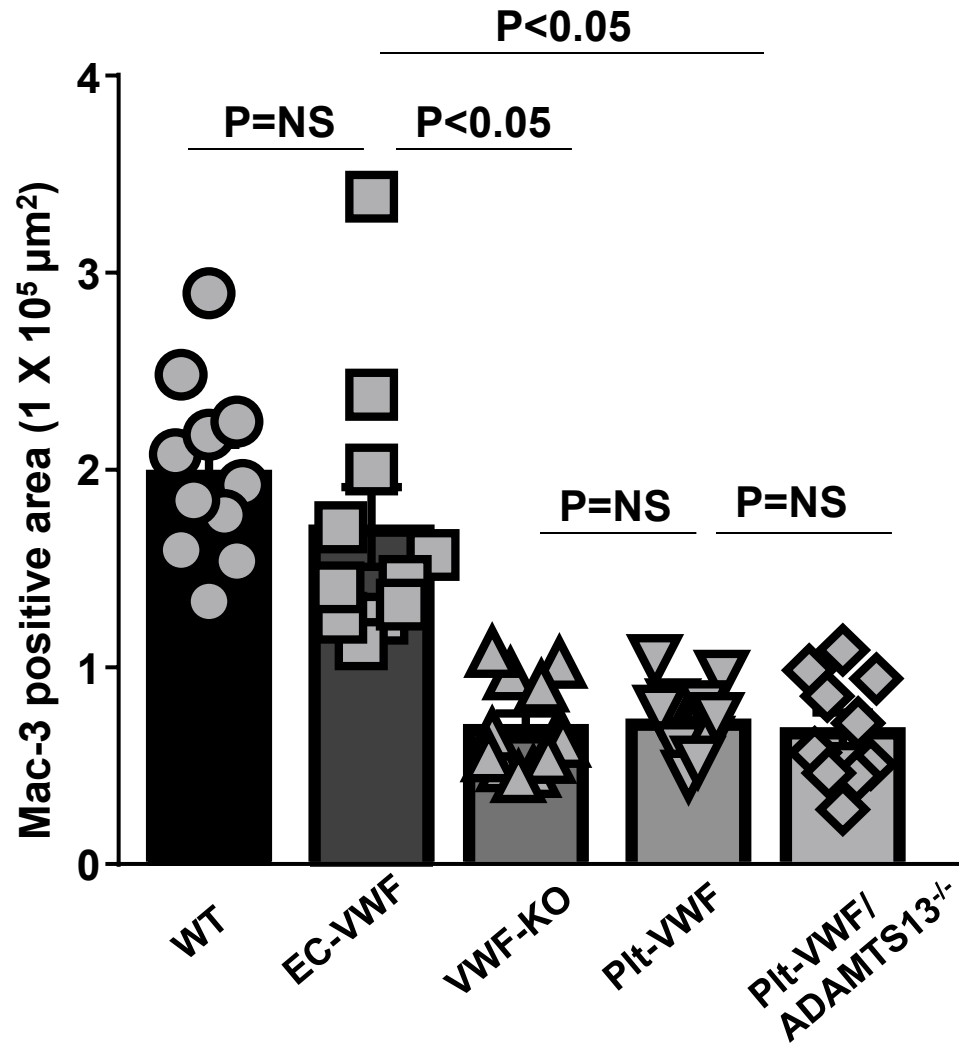

**Figure SII. Monocyte/macrophage-positive area in female mice fed a high-fat “Western” diet for 14 weeks.** Values are represented as means  $\pm$  SEM. N=10-12 mice/group. Value for each mouse represents a mean of 16 fields from 4 serial sections. Statistical analysis: Kruskal-Wallis test followed by uncorrected Dunn’s test. NS: non-significant.

**A**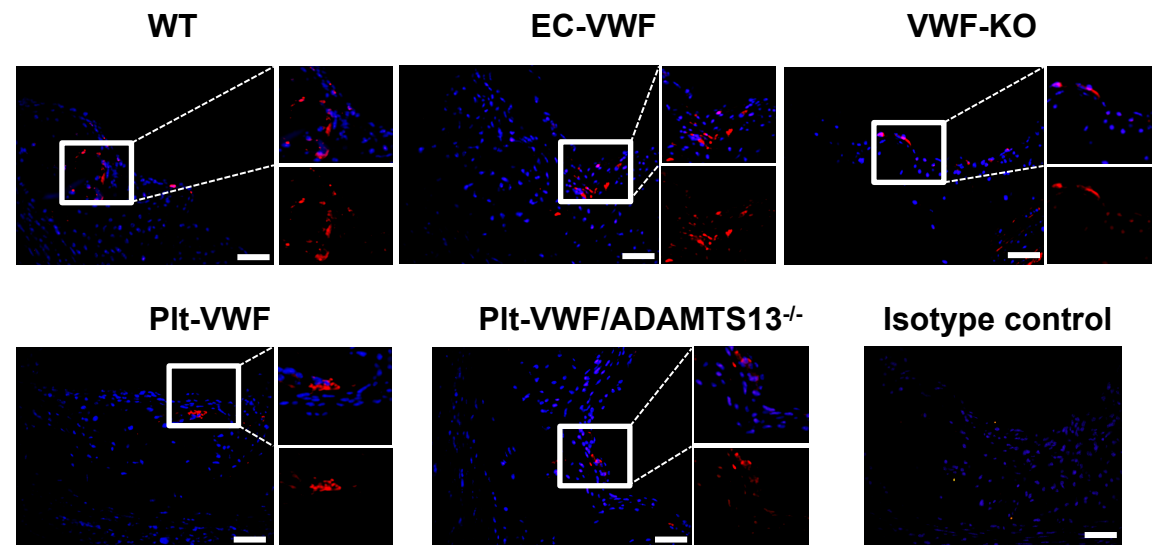**B**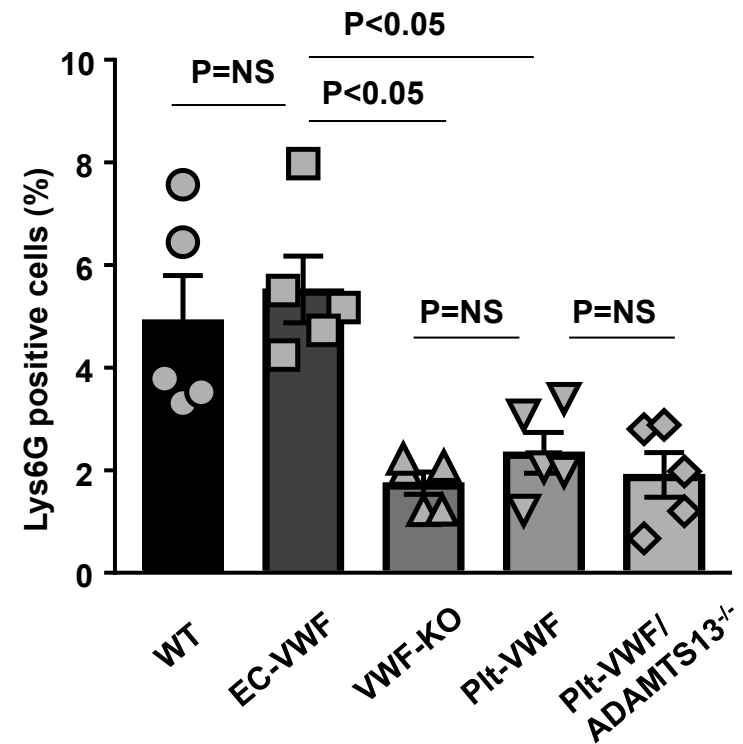

**Figure SIII. Neutrophil-positive area in female mice fed a high-fat “Western” diet for 14 weeks.** Values are represented as means  $\pm$  SEM. N=5 mice/group. Value for each mouse represents a mean from 4 serial sections. Statistical analysis: Parametric one-way ANOVA followed by Sidak's multiple comparisons test. NS: non-significant

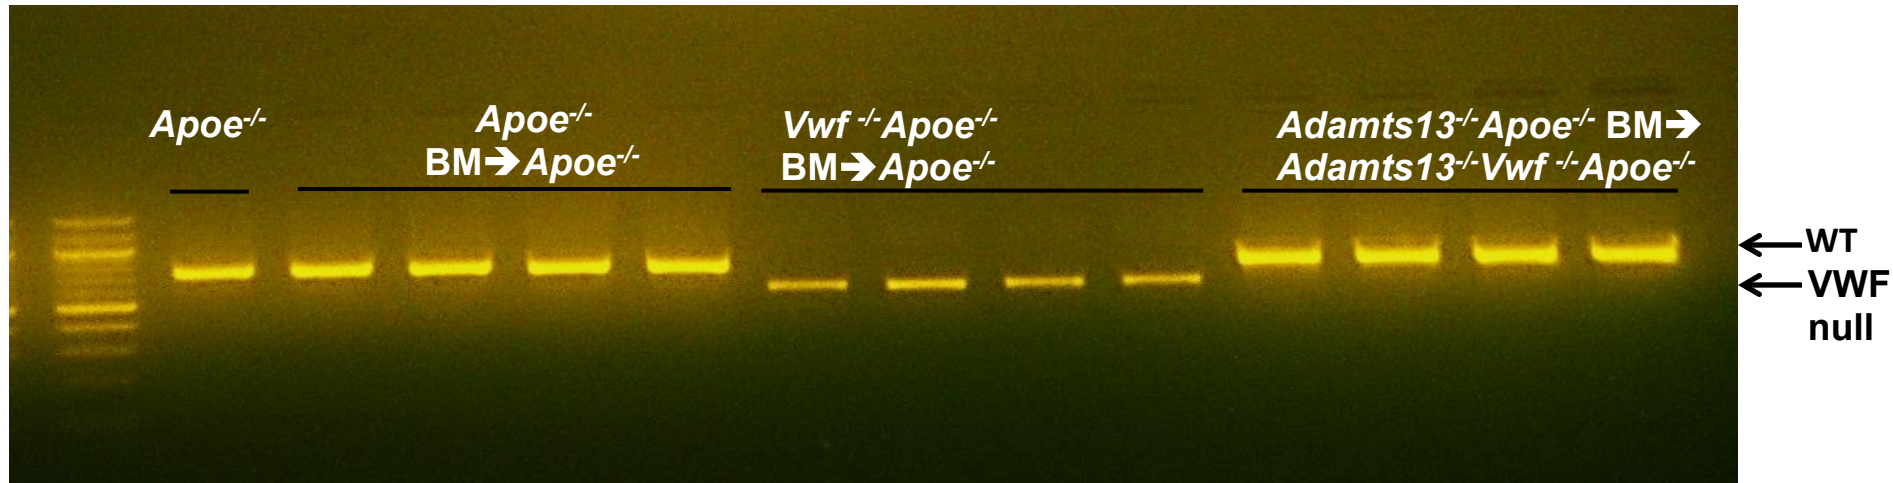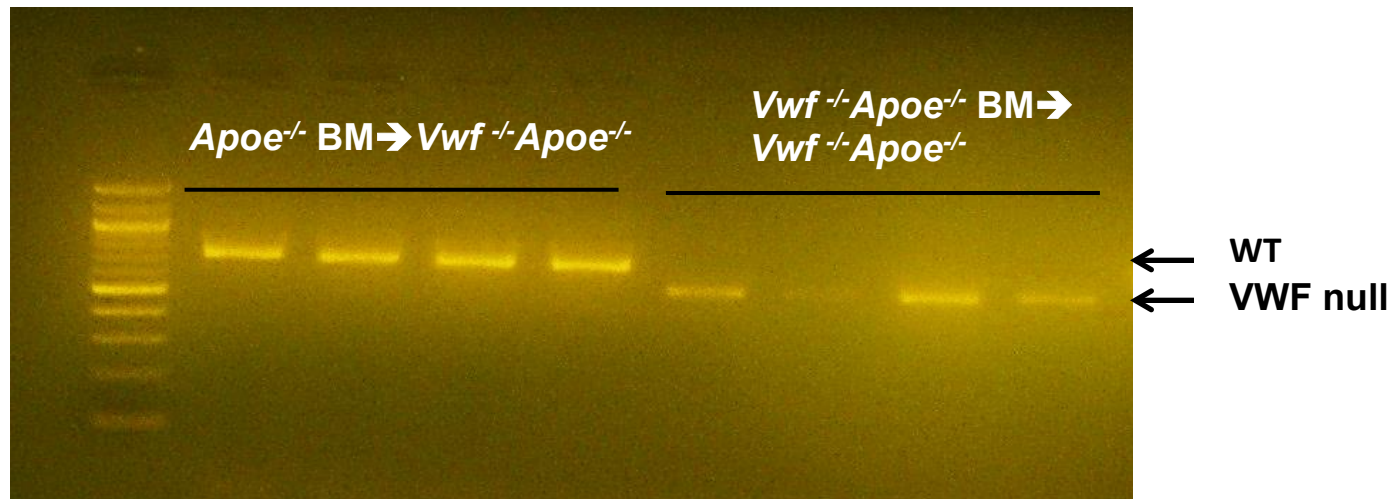

**Figure SIV.** Successful bone marrow transplantation was confirmed after 4 weeks by PCR to check presence of the genomic DNA of the respective donor mice in peripheral blood cells .
